# Supplementary material
Source: MDPI journal article supplement (https://www.mdpi.com/2071-1050/12/23/9942)
Supplement: s1 [file s1]

## Sheet: Post Hoc tests
1.	Independent variable: Household size
1-1.	Dependent variable: (I) Food waste situation
	Comparison			Mean Difference	SE	df	t	ptukey
	1	-	2	0.129	0.0667	1955	1.93	0.214
		-	3	0.569	0.0661	1955	8.62	< .001
		-	4 and more	0.458	0.0666	1955	6.87	< .001
	2	-	3	0.44	0.0593	1955	7.43	< .001
		-	4 and more	0.329	0.06	1955	5.48	< .001
	3	-	4 and more	-0.112	0.0593	1955	-1.89	0.234
1-2.	Dependent variable: (II) Food preparation
	Comparison			Mean Difference	SE	df	t	ptukey
	1	-	2	-0.1454	0.0521	1955	-2.789	0.027
		-	3	0.048	0.0516	1955	0.929	0.789
		-	4 and more	-0.0143	0.0521	1955	-0.274	0.993
	2	-	3	0.1933	0.0463	1955	4.171	< .001
		-	4 and more	0.1311	0.0468	1955	2.798	0.027
	3	-	4 and more	-0.0622	0.0463	1955	-1.344	0.535
1-3.	Dependent variable: (III) Self-catering
	Comparison			Mean Difference	SE	df	t	ptukey
	1	-	2	-0.1253	0.0725	1955	-1.728	0.309
		-	3	0.165	0.0718	1955	2.298	0.099
		-	4 and more	-0.0508	0.0724	1955	-0.701	0.897
	2	-	3	0.2903	0.0645	1955	4.503	< .001
		-	4 and more	0.0745	0.0652	1955	1.143	0.663
	3	-	4 and more	-0.2158	0.0644	1955	-3.351	0.005
1-4.	Dependent variable: (IV) Expiration date concerns
	Comparison			Mean Difference	SE	df	t	ptukey
	1	-	2	-0.12952	0.0615	1955	-2.1066	0.151
		-	3	-0.18948	0.0609	1955	-3.1105	0.01
		-	4 and more	-0.13066	0.0614	1955	-2.1267	0.145
	2	-	3	-0.05996	0.0547	1955	-1.0963	0.692
		-	4 and more	-0.00113	0.0553	1955	-0.0205	1
	3	-	4 and more	0.05882	0.0546	1955	1.0766	0.704
1-5.	Dependent variable: (V) Food waste concerns
	Comparison			Mean Difference	SE	df	t	ptukey
	1	-	2	-0.1648	0.0409	1955	-4.024	< .001
		-	3	-0.0566	0.0406	1955	-1.395	0.502
		-	4 and more	-0.082	0.0409	1955	-2.003	0.187
	2	-	3	0.1082	0.0364	1955	2.97	0.016
		-	4 and more	0.0828	0.0368	1955	2.25	0.11
	3	-	4 and more	-0.0254	0.0364	1955	-0.697	0.898
1-6.	Dependent variable: (VI) Excessive food purchase
	Comparison			Mean Difference	SE	df	t	ptukey
	1	-	2	0.04947	0.0647	1955	0.765	0.87
		-	3	0.00657	0.0641	1955	0.102	1
		-	4 and more	-0.13043	0.0646	1955	-2.018	0.182
	2	-	3	-0.0429	0.0575	1955	-0.746	0.879
		-	4 and more	-0.1799	0.0581	1955	-3.094	0.011
	3	-	4 and more	-0.137	0.0575	1955	-2.383	0.081
1-7.	Dependent variable: (VII) Influence of COVID-19
	Comparison			Mean Difference	SE	df	t	ptukey
	1	-	2	0.07613	0.0572	1955	1.332	0.543
		-	3	-0.00218	0.0566	1955	-0.0384	1
		-	4 and more	-0.09135	0.0571	1955	-1.5995	0.379
	2	-	3	-0.07831	0.0508	1955	-1.5404	0.413
		-	4 and more	-0.16749	0.0514	1955	-3.2599	0.006
	3	-	4 and more	-0.08918	0.0508	1955	-1.7558	0.295
2.	Independent variable: Household yearly income
2-1.	Dependent variable: (I) Food waste situation
	Comparison			Mean Difference	SE	df	t	ptukey
	Lower income	-	Middle income	0.1474	0.0534	1956	2.759	0.016
		-	Higher income	0.1139	0.0554	1956	2.054	0.1
	Middle income	-	Higher income	-0.0335	0.0578	1956	-0.58	0.831
3.	Independent variable: Employment status
3-1.	Dependent variable: (I) Food waste situation
	Comparison			Mean Difference	SE	df	t	ptukey
	Full-time employed	-	Part-time / Self employed	-0.3132	0.0525	1956	-5.97	< .001
		-	Unemployed	-0.2471	0.0556	1956	-4.44	< .001
	Part-time / Self employed	-	Unemployed	0.0661	0.0594	1956	1.11	0.506
3-2.	Dependent variable: (II) Food preparation
	Comparison			Mean Difference	SE	df	t	ptukey
	Full-time employed	-	Part-time / Self employed	-0.1751	0.0402	1956	-4.36	< .001
		-	Unemployed	-0.2322	0.0426	1956	-5.46	< .001
	Part-time / Self employed	-	Unemployed	-0.0571	0.0455	1956	-1.25	0.421
3-3.	Dependent variable: (III) Self-catering
	Comparison			Mean Difference	SE	df	t	ptukey
	Full-time employed	-	Part-time / Self employed	-0.3241	0.0559	1956	-5.8	< .001
		-	Unemployed	-0.2332	0.0592	1956	-3.94	< .001
	Part-time / Self employed	-	Unemployed	0.0909	0.0633	1956	1.44	0.323
3-4.	Dependent variable: (IV) Expiration date concerns
	Comparison			Mean Difference	SE	df	t	ptukey
	Full-time employed	-	Part-time / Self employed	-0.1648	0.0474	1956	-3.48	0.002
		-	Unemployed	-0.2361	0.0502	1956	-4.7	< .001
	Part-time / Self employed	-	Unemployed	-0.0713	0.0537	1956	-1.33	0.38
3-5.	Dependent variable: (V) Food waste concerns
	Comparison			Mean Difference	SE	df	t	ptukey
	Full-time employed	-	Part-time / Self employed	-0.1139	0.0317	1956	-3.59	< .001
		-	Unemployed	-0.0675	0.0336	1956	-2.01	0.11
	Part-time / Self employed	-	Unemployed	0.0464	0.0359	1956	1.29	0.401
